# Supplementary material for: Trojan-Like Internalization of Anatase Titanium Dioxide Nanoparticles by Human Osteoblast Cells
Source: PubMed Central journal article supplement (PMC4810327; doi:10.1038/srep23615), 2016-03-29
Supplement: srep23615-s1.pdf [file srep23615-s1.pdf]

# Trojan-Like Internalization of Anatase Titanium Dioxide Nanoparticles by Human Osteoblast Cells

A. R. Ribeiro<sup>1,2,3\*</sup>, S. Gemini-Piperni<sup>1,2\*</sup>, R. Travassos<sup>1</sup>, L. Lemgruber<sup>1,4</sup>, R. Carvalho<sup>1</sup>, A. L. Rossi<sup>5</sup>, M. Farina<sup>6</sup>, K. Anselme<sup>7</sup>, T. Shokhufar<sup>2,8</sup>, R. Shahbazian-Yassar<sup>2,9</sup>, R. Borojevic<sup>2,10</sup>, L. A. Rocha<sup>2,11</sup>, J. Werckmann<sup>1,2</sup>, J.M. Granjeiro<sup>1, 2,12</sup>

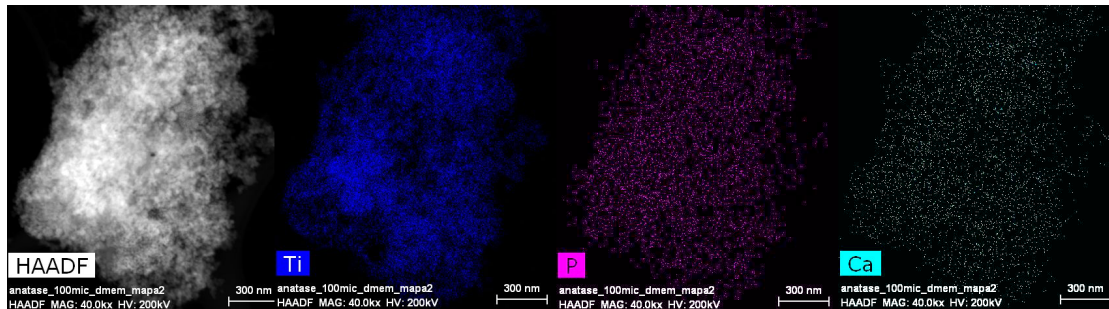

**Figure S1: Anatase bio-complexes formation in medium culture without serum and albumin stabilization (100 µg/ml anatase):** Dark-field STEM image showing where the corresponding elemental maps were obtained; STEM/EDS Ti-K map; STEM/EDS P-K map, STEM/EDS Ca-K map;

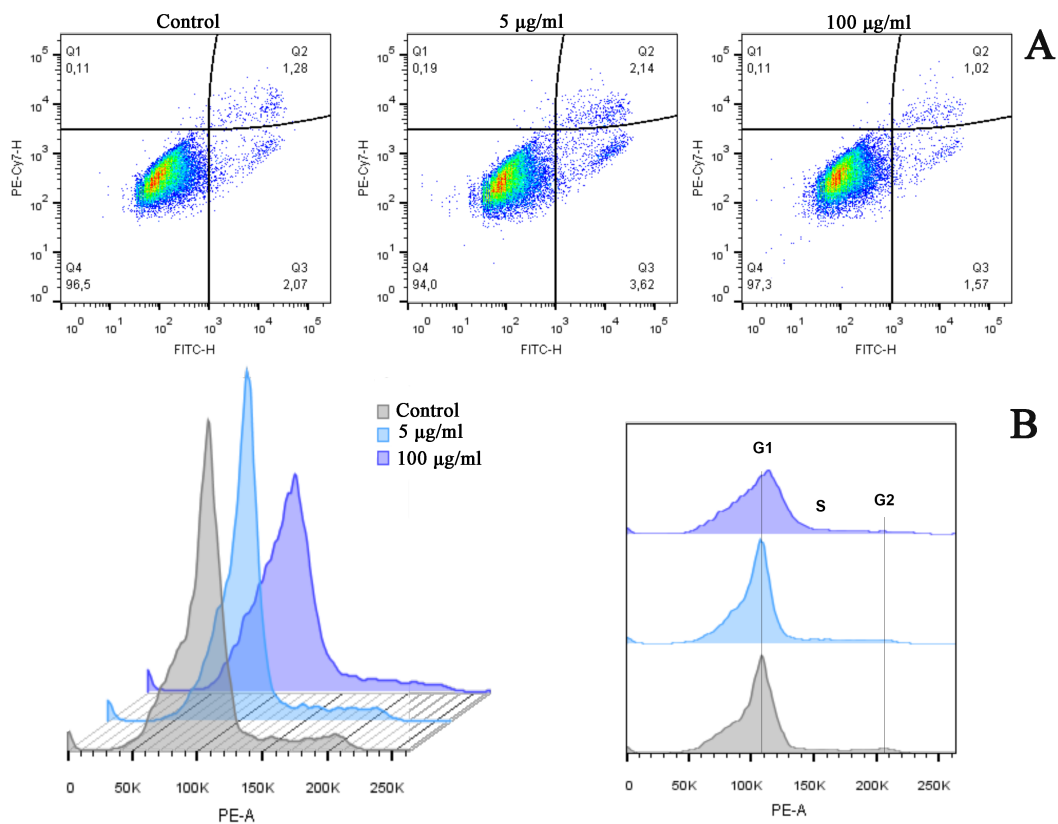

**Figure S2: Bone cell viability and cell cycle analysis after exposure to anatase nanoparticles:** (A) Dose-dependent effect of anatase on cell apoptosis using flow

cytometry after staining with annexin V / PI; (B) cell cycle analysis.
